# Supplementary material for: LTβR-RelB signaling in intestinal epithelial cells protects from chemotherapy-induced mucosal damage
Source: PubMed Central journal article supplement (PMC11169669; doi:10.3389/fimmu.2024.1388496), 2024-05-30
Supplement: DataSheet_1.pdf [file DataSheet_1.pdf]

**Supplementary Table 1. Primers for quantitative PCR**

| Gene          | Forward primer            | Reverse primer            |
|---------------|---------------------------|---------------------------|
| Hprt          | CTGGTGAAAAGGACCTCTCGAAG   | CCAGTTTCACTAATGACACAAACG  |
| Tnf           | ACGGCATGGATCTCAAAGAC      | AGATAGCAAATCGGCTGACG      |
| Il6           | ACAAGTCGGAGGCTTAATTACACAT | AATCAGAATTGCCATTGCACAA    |
| Il1 $\beta$   | TGGACCTTCCAGGATGAGGACA    | GTTTCATCTCGGAGCCTGTAGTG   |
| Ifng          | TCAAGTGGCATAGATGTGGAAGAA  | TGGCTCTGCAGGATTTTCATG     |
| Il22          | TCCGAGGAGTCAGTGCTAAA      | AGAACGTCTTCCAGGGTGAA      |
| Reg3 $\beta$  | ATGGCTCCTACTGCTATGCC      | GTGTCCTCCAGGCCTCTTT       |
| Reg3 $\gamma$ | ATGGCTCCTATTGCTATGCC      | GATGTCCTGAGGGCCTCTT       |
| Muc2          | ACATCACCTGTCCCGACTTC      | GAGCAAGGGACTCTGGTCTG      |
| Cxcl1         | GCTGGGATTCACCTCAAGAA      | TGGGGACACCTTTTAGCATC      |
| Cxcl2         | CCTGGTTCAGAAAATCATCCA     | CTTCCGTTGAGGGACAGC        |
| Cxcl9         | TGTGGAGTTCGAGGAACCTT      | TGCCTCGGCTGGTGCTG         |
| Cxcl10        | TGAATCCGGAATCTAAGACCATCAA | AGGACTAGCCATCCACTGGGTAAAG |
| Cxcl13        | CAGAATGAGGCTCAGCACAGC     | CAGAATACCGTGGCCTGGAG      |
| Ccl2          | GCTGGAGCATCCACGTGTT       | ATCTTGCTGGTGAATGAGTAGCA   |
| LIGHT         | GGAGACATAGTAGCTCATCTGCC   | CCACCAATACCTATCAAGCTGGC   |
| LT $\beta$    | CCTGTTGTTGGCAGTGCCTATC    | GACGGTTTGCTGTCATCCAGTC    |
| LT $\alpha$   | TCCACTCCCTCAGAAGCACT      | AGAGAAGCCATGTCCGGAG AA    |
| NFk $\beta$ 2 | TTGTCTGACATGGGTCTCCA      | TGTCTTCTTTCACCTCTGCTGT    |
| Mki67         | GAGGAGAAACGCCAACCAAGAG    | TTTGTCTCGGTGGCGTTATCC     |
